# Supplementary material
Source: Springer Nature journal article supplement (https://www.springermedizin.de/resource/supplementary/12958_2010_735_MOESM5_ESM.pdf/9568368)

**% stimulation of acrosome  
reaction**

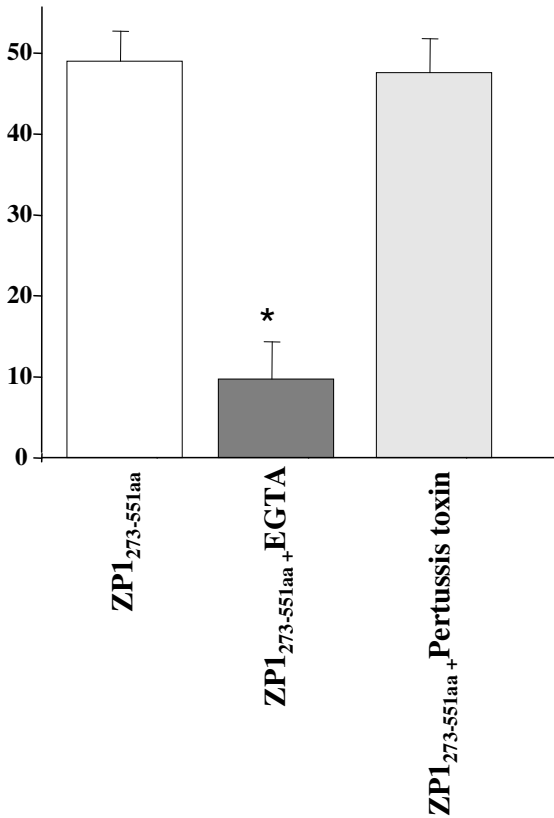

Supplement: MOESM5 [file 9568368]
